# Supplementary material for: Exosomal Circular RNA hsa_circ_0046060 of Umbilical Cord Mesenchymal Stromal Cell Ameliorates Glucose Metabolism and Insulin Resistance in Gestational Diabetes Mellitus via the miR-338-3p/G6PC2 Axis
Source: Hindawi journal article supplement (doi:10.1155/2022/9218113), 2022-06-11
Supplement: f1 [file 9218113.f1.zip]

**Table S1 The primers used by RT-qPCR and Small interfering RNA**

| primer name            |         | Primer sequence (5' to 3') |
|------------------------|---------|----------------------------|
| hsa_circ_0046060       | Forward | CCCTGCGCTGAACTACACG        |
|                        | Reverse | ACGATCAAGCCAGCATTGGA       |
| has-GAPDH              | Forward | TGCCACTCAGAAGACTGTGG       |
|                        | Reverse | TTCAGCTCTGGGATGACCTT       |
| si-hsa_circ_0046060-NC |         | GGCAAGCCGTACACCTTACCT      |
| si-hsa_circ_0046060-1  |         | ATCGCCCTGCGCTGAACTACA      |
| si-hsa_circ_0046060-2  |         | AGATCGCCCTGCGCTGAACTA      |
| si-hsa_circ_0046060-3  |         | TGCGCTGAACTACACGCAGTA      |
| mmu_circ_0002819       | Forward | CCCTGCGCTGAACTACACG        |
|                        | Reverse | ACGATCAAGCCAGCATTGGA       |
| mmu-GAPDH              | Forward | AACAGCAACTCCCACTCTTC       |
|                        | Reverse | CCTGTTGCTGTAGCCGTATT       |
| si-mmu_circ_0002819-NC |         | GGGAACGGCAAGCGGAGUAUA      |
| si-mmu_circ_0002819-1  |         | GGAGCAGGAACUAGAGGUAGC      |
| si-mmu_circ_0002819-2  |         | CAUCCAUCUUUGUCUACGACU      |
| si-mmu_circ_0002819-3  |         | GCCCAUCCAUCUUUGUCUACG      |
| hsa-G6PC2              | Forward | CAGAAGGACTACCGAGCTTACT     |
|                        | Reverse | TGGTTTGCTTGAGCTGTGTTC      |
| si-hsa-G6PC2-NC        |         | GGCAAGCCGTACACCTTACCT      |
| si-hsa-G6PC2-1         |         | GACATAAAAATCGGAAGTTCTGT    |
| si-hsa-G6PC2-2         |         | CTGGATTAGTCTCTATGTATACT    |
| si-hsa-G6PC2-3         |         | CTCTAATAGAACATTATTCAACC    |
